# Supplementary material for: Proteinas quinasas - dependientes del CAMP y lipolisis
Source: Royal Society of Chemistry journal article supplement (doi:10.1039/c7dt03823b), 1979-01-01
Supplement: c7dt03823b1.pdf [file c7dt03823b1.pdf]

# Substitution of the Laser Borane *anti*-B<sub>18</sub>H<sub>22</sub> with Pyridine: A Structural and Photophysical Study of some Unusually Structured Macropolyhedral Boron Hydrides

Michael G. S. Londesborough,<sup>1</sup> Jiří Dolanský,<sup>1,2</sup> Tomáš Jelínek,<sup>1,3</sup> John D. Kennedy,<sup>1,4</sup> Ivana Cisařová,<sup>2</sup> Robert D. Kennedy,<sup>4</sup> Daniel Roca-Sanjuán,<sup>5</sup> Antonio Francés-Monerris,<sup>5</sup> Kamil Lang,<sup>1</sup> and William Clegg.<sup>6</sup>

<sup>1</sup> Institute of Inorganic Chemistry of the Czech Academy of Sciences, v.v.i., 250 68, Husinec-Řež, Czech Republic.

<sup>2</sup> Charles University in Prague, Department of Inorganic Chemistry, Hlavova 2030/8, 128 43 Prague 2, Czech Republic.

<sup>3</sup> Katchem s.r.o., pracoviště Minická 635, 278 01 Kralupy nad Vltavou, Czech Republic.

<sup>4</sup> The School of Chemistry of the University of Leeds, Leeds UK LS2 9JT.

<sup>5</sup> Instituto de Ciencia Molecular, Universitat de València, P.O. Box 22085, ES-46071, València.

<sup>6</sup> The School of Chemistry of Newcastle University, Newcastle upon Tyne UK NE1 7RU.

## Content

- SI 1.** Selected crystallographically determined interatomic distances for the molecular structure of  $B_{18}H_{20}Py_2$  **2**.
- SI 2.** Simple factorisation of the electronic structure of compound **2**.
- SI 3.** Selected crystallographically determined interatomic distances for the molecular structure of  $B_{16}H_{18}Py_2$  **3a** and  $B_{16}H_{18}Pic_2$  **3b**.
- SI 4.** Molecular structure of **3b**.
- SI 5.** Selected measured  $^{11}B$  and  $^1H$  NMR parameters for  $B_{16}H_{18}(NC_6H_4-4-isoPr)_2$  (compound **3c**) and  $B_{16}H_{18}(NC_6H_4-4-Me)_2$  (compound **3b**) in  $(CD_3)_2CO$  solution at *ca.* 293 K, together with their tentative assignments.
- SI 6.** Selected crystallographically determined interatomic distances for the molecular structure of  $B_{18}H_{20}Py$  **4**.
- SI 7.** Measured  $^{11}B$  and  $^1H$  NMR chemical shifts and tentative assignments for *anti*- $B_{18}H_{20}-8'$ -Py (compound **4**);  $CD_2Cl_2$  solution.
- SI 8.** Comparison  $^{11}B$  and  $^1H$  NMR chemical shifts and assignments for neutral  $[5'-\{(MeNH)C_3N_2HMe_2\}-anti-B_{18}H_{20}]$  and for the  $[anti-B_{18}H_{21}]^-$  anion.
- SI 9.** Crystal structure diagram for compound **3b**.
- SI 10.** CASSCF natural orbitals that compose the CAS active space of  $B_{18}H_{20}Py$ , compound **4**, at the  $(S_0)_{min}$  structure.
- SI 11.** Full rationale for the absorption characteristics of compound **4**.
- SI 12.** CASSCF natural orbitals that compose the CAS active space of  $B_{16}H_{18}Py_2$ , compound **4**, at the  $(S_0)_{min}$  structure.

## References

**SI 1.** Selected crystallographically determined interatomic distances for the molecular structure of  $B_{18}H_{20}Py_2$  **2**; additional values may be found in the crystallographic cif file.

|        |          |         |          |
|--------|----------|---------|----------|
| B5-B6  | 1.870(2) | B6'-N61 | 1.566(2) |
| B5-B10 | 2.007(2) | B9'-N91 | 1.568(2) |
| B6-B7  | 1.851(2) | B5-B9'  | 1.935(2) |
| B7-B8  | 1.919(2) | B8'-B9' | 1.851(2) |
| B8-B9  | 1.814(3) | B7'-B8' | 1.880(2) |
| B9-B10 | 1.797(2) | B6'-B7' | 1.835(2) |
|        |          | B6-B6'  | 1.899(2) |

**SI 2.** Simple factorisation of the electronic structure of compound **2**.

Rationalisation of the overall electronic structure of compound **2** can be found by reference to simple Lipscomb-type semi-localised bonding schemes<sup>a,b</sup> of its constituent conjoined two subclusters. Such representations for compound **5** and  $B_{10}H_{14}$  are in *schematic bonding diagrams V* and *VI* respectively. For the two-atoms-in-common cluster fusion mode, a common instance is when the B-H-B three-centre bridge of one subcluster model mimics the B-B-B three-centre bond in the other subcluster model, and the latter formally replaces the former.<sup>c,d</sup> In order to accommodate this, the partial three-centre bonding character within the *nido*-decaboranyl subcluster **VI** needs to be localised into one two-centre and one three-centre bond (schematic **VII**). This breaks the bonding symmetry and thence significantly perturbs the internal molecular orbital structure; this change in internal ‘intracluster’ bonding will change the chemical properties of the cluster. The formal B-B-B fusion replacement of B-H-B then models a bonding description for compound **5** (Schematics **VIII** and **IX**). It can be seen that the electronic structure of the *arachno* subcluster retains its single-cluster characteristics, in contrast to that of the *nido* residue, which is perturbed near the site of fusion.

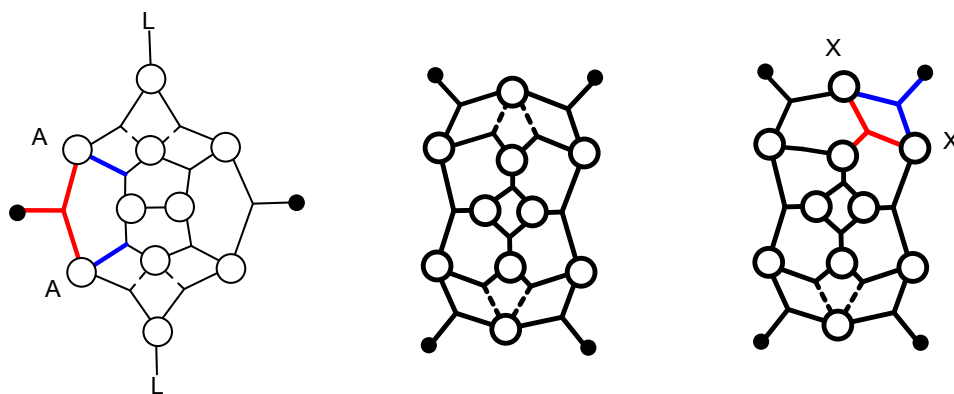

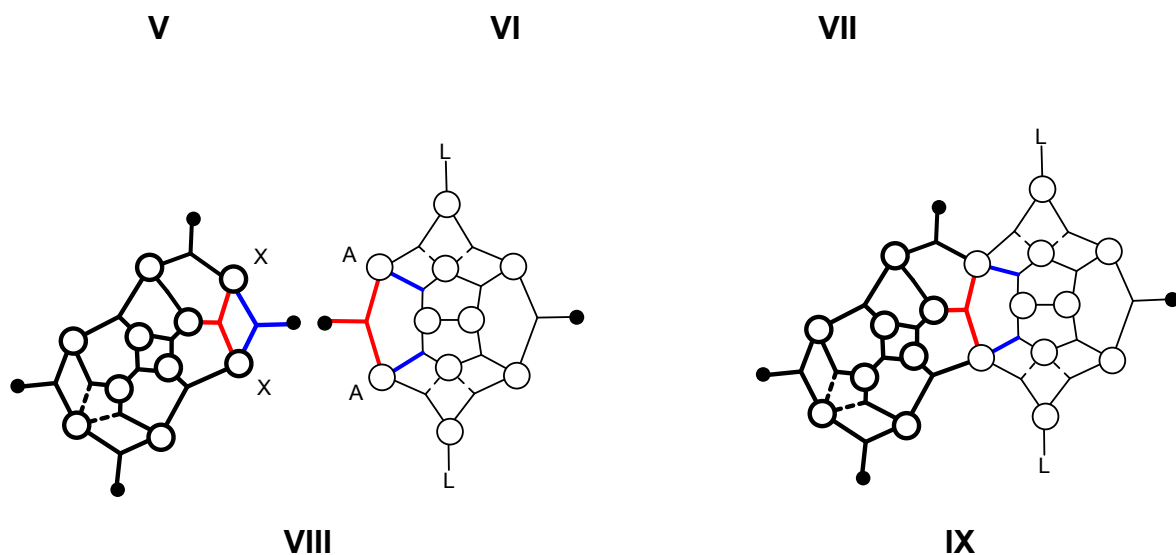

**SI 3.** Selected crystallographically determined interatomic distances for the molecular structure of  $B_{16}H_{18}Py_2$  **3a** and  $B_{16}H_{18}Pic_2$  **3b**; additional values may be found in the crystallographic cif files.

|        | <b>3a</b> | <b>3b</b> |         | <b>3a</b> | <b>3b</b> |
|--------|-----------|-----------|---------|-----------|-----------|
| B5-B6  | 1.777(4)  | 1.781(3)  | B3'-N31 | 1.566(3)  | 1.563(2)  |
| B5-B10 | 1.899(4)  | 1.942(4)  | B8'-N81 | 1.571(3)  | 1.565(2)  |
| B6-B7  | 1.658(5)  | 1.692(3)  | B5-B4'  | 1.830(3)  | 1.832(3)  |
| B7-B8  | 1.850(6)  | 1.819(4)* | B7'-B8' | 1.894(3)  | 1.885(3)  |
| B8-B9  | 1.800(7)  | 1.856(7)* | B3'-B4' | 1.882(3)  | 1.874(3)  |
| B9-B10 | 1.774(5)  | 1.785(6)  | B3'-B8' | 1.885(4)  | 1.911(3)  |
|        |           |           | B6-B7'  | 1.806(4)  | 1.807(3)  |

\*these crystallographically derived distances for **3b** severely affected by crystallographic disorder.

SI 4. Molecular structure of **3b**.

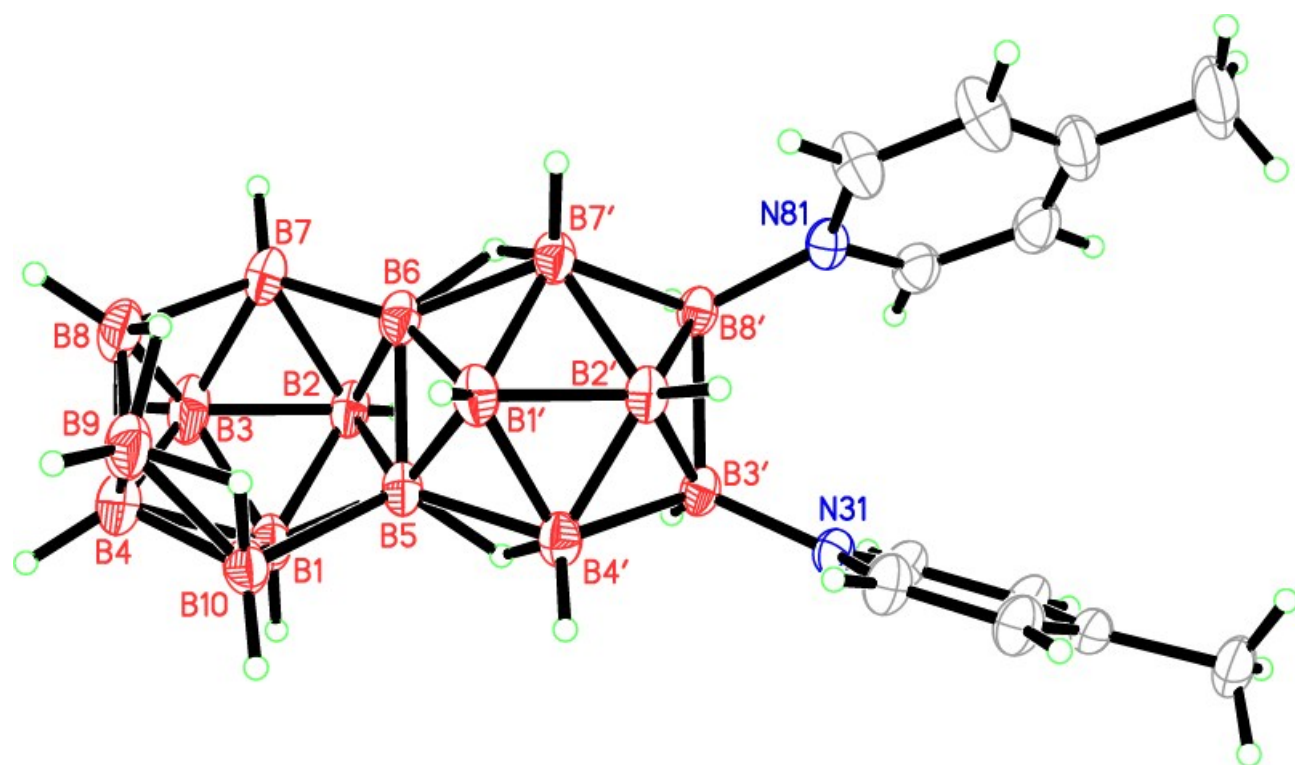

**SI 5.** Selected measured  $^{11}\text{B}$  and  $^1\text{H}$  NMR parameters for  $\text{B}_{16}\text{H}_{18}(\text{NC}_6\text{H}_4\text{-4-isoPr})_2$  (compound **3c**) and  $\text{B}_{16}\text{H}_{18}(\text{NC}_6\text{H}_4\text{-4-Me})_2$  (compound **3b**) in  $(\text{CD}_3)_2\text{CO}$  solution at *ca.* 293 K, together with their tentative assignments.

| Assignment       | $\text{B}_{16}\text{H}_{18}(\text{NC}_6\text{H}_4\text{-4-isoPr})_2$ <b>3c</b> |                                  | $\text{B}_{16}\text{H}_{18}(\text{NC}_6\text{H}_4\text{-4-Me})_2$ <b>3b</b> |                                 |
|------------------|--------------------------------------------------------------------------------|----------------------------------|-----------------------------------------------------------------------------|---------------------------------|
|                  | $\delta(^{11}\text{B})/\text{ppm}$                                             | $\delta(^1\text{H})/\text{ppm}$  | $\delta(^{11}\text{B})/\text{ppm}$                                          | $\delta(^1\text{H})/\text{ppm}$ |
| B(6)             | +21.8                                                                          | <i>conjuncto</i> site            | +21.7                                                                       | <i>conjuncto</i> site           |
| BH(3)            | +4.1                                                                           | +2.94                            | +4.0                                                                        | +2.95                           |
| BH(10)           | +1.1                                                                           | +3.13                            | <i>ca.</i> +0.9                                                             | +3.13                           |
| BH(2')           | +0.2                                                                           | +3.21                            | -0.12                                                                       | +3.25                           |
| B(5)             | -6.5                                                                           | <i>conjuncto</i> site <i>ca.</i> | -7.0                                                                        | <i>conjuncto</i> site           |
| BH(1)(8) and (9) | <i>ca.</i> -8.5                                                                | +2.62                            | <i>ca.</i> -8.5                                                             | +2.59                           |
|                  | <i>ca.</i> -8.5                                                                | +2.11                            | <i>ca.</i> -8.5                                                             | +2.28                           |
|                  | <i>ca.</i> -8.5                                                                | +2.56                            | <i>ca.</i> -8.5                                                             | +2.59                           |
| BH(7)            | -10.1                                                                          | +2.48                            | -10.1                                                                       | +2.50                           |
| BH(8')           | -15.4                                                                          | +2.28                            | -15.5                                                                       | +2.34                           |
| BH(3')           | -18.6                                                                          | +1.98                            | -18.7                                                                       | +2.00                           |
| BH(7)            | -23.8                                                                          | +2.02                            | -23.9                                                                       | +2.00                           |
| BH(4')           | -26.9                                                                          | +1.60                            | -27.0                                                                       | +1.58                           |
| BH(2)            | -27.8                                                                          | -0.63                            | -27.7                                                                       | -0.62                           |
| BH(4)            | -43.2                                                                          | +0.19                            | -43.3                                                                       | +0.20                           |
| BH(1')           | -46.0                                                                          | -1.25                            | -46.1                                                                       | -1.23                           |
| mH(6,7')         | -                                                                              | -1.74                            |                                                                             | -1.71                           |
| mH(9,10)         | -                                                                              | -1.74                            |                                                                             | -1.71                           |
| mH(8,9)          | -                                                                              | -2.86                            |                                                                             | -2.84                           |
| mH(5,4')         | -                                                                              | +0.82                            |                                                                             | +0.85                           |
| C6H4             | -                                                                              | +7.6 (4H), +8.6 (4H)             | +7.6 (4H), +8.6 (4H)                                                        |                                 |
| CH               |                                                                                | +2.92 (2H)                       |                                                                             | -                               |
| Me               |                                                                                | +1.27 (12H)                      |                                                                             | +2.54(6H)                       |

**SI 6.** Selected crystallographically determined interatomic distances for the molecular structure of B<sub>18</sub>H<sub>20</sub>Py **4**; additional values may be found in the crystallographic cif file.

|        |          |          |          |
|--------|----------|----------|----------|
| B5-B6  | 1.807(2) | B8'-N81  | 1.549(2) |
| B5-B10 | 1.969(2) | B5'-B10' | 2.037(3) |
| B6-B7  | 1.834(2) | B5-B5'   | 1.814(2) |
| B7-B8  | 1.950(2) | B6-B8'   | 1.831(2) |
| B8-B9  | 1.807(2) | B8'-B9'  | 1.650(2) |
| B9-B10 | 1.782(2) | B9'-B10' | 1.784(2) |

**SI 7.** Measured <sup>11</sup>B and <sup>1</sup>H NMR chemical shifts and tentative assignments for *anti*-B<sub>18</sub>H<sub>20</sub>-8'-Py (compound **4**); CD<sub>2</sub>Cl<sub>2</sub> solution.

| Provisional assignment | δ( <sup>11</sup> B) | δ( <sup>1</sup> H) | correlations with μH |
|------------------------|---------------------|--------------------|----------------------|
| BH(4)                  | -42.9               | +0.18              |                      |
| BH(4')                 | -35.8               | -0.06*             |                      |
| BH(2)                  | -32.1               | -0.06*             |                      |
| BH(2')                 | -30.0               | +0.61              |                      |
| BH                     | -20.2               | +2.20              | μH -1.44             |
| BH(7)                  | -17.0               | +2.56              | μH -0.42             |
| BH                     | -15.5               | +1.99              |                      |
| BH                     | -6.9                | -                  | μH -1.44             |
| B                      | -4.4                | -                  | μH -2.77             |
| BH(1)                  | -0.6                | +3.05              |                      |
| BH(9)                  | +0.3                | +3.41              | μH -2.77, +0.01      |
| BH                     | +1.4                | +3.78              | μH -2.43             |
| B, BH (10), BH(6)      | ca. +6.7**          | -, +3.83, +3.41    | μH -0.42, +0.01      |
| B                      | +9.4                | -                  |                      |
| BH(3)                  | +10.7               | -3.62              |                      |
| BH(5)                  | +11.3               | -                  |                      |

Notes: \* two <sup>1</sup>H resonances by chance coincident. \*\* Three <sup>11</sup>B resonances by chance coincident.

**SI 8.** Comparison  $^{11}\text{B}$  and  $^1\text{H}$  NMR chemical shifts and assignments for neutral  $[\text{5}'\text{-}\{(\text{MeNH})\text{C}_3\text{N}_2\text{HMe}_2\}\text{-anti-B}_{18}\text{H}_{20}]$  (data from reference 6) and for the  $[\text{anti-B}_{18}\text{H}_{21}]^-$  anion (data from reference 16).

| Assignment <sup>6,16</sup> | $[\{(\text{MeNH})\text{C}_3\text{N}_2\text{HMe}_2\}\text{B}_{18}\text{H}_{20}]^*$ |                                 | $[\text{anti-B}_{18}\text{H}_{21}]^-$ anion <sup>**</sup> |                                 |
|----------------------------|-----------------------------------------------------------------------------------|---------------------------------|-----------------------------------------------------------|---------------------------------|
|                            | $\delta(^{11}\text{B})/\text{ppm}$                                                | $\delta(^1\text{H})/\text{ppm}$ | $\delta(^{11}\text{B})/\text{ppm}$                        | $\delta(^1\text{H})/\text{ppm}$ |
| BH(1)                      | -3.4                                                                              | +2.72                           | -4.5                                                      | +2.64                           |
| BH(2)                      | -29.5                                                                             | -0.89                           | -29.2                                                     | -0.92                           |
| BH(3)                      | +13.5                                                                             | +3.55                           | +13.4                                                     | +3.50                           |
| BH(4)                      | -38.9                                                                             | +0.19                           | -41.1                                                     | +0.17                           |
| BH(5/6')                   | +15.3                                                                             | <i>conjuncto</i> site           | +17.0                                                     | <i>conjuncto</i> site           |
| BH(6,7')                   | -0.2                                                                              | <i>conjuncto</i> site           | +0.1                                                      | <i>conjuncto</i> site           |
| BH(7)                      | -12.0                                                                             | +2.80                           | -13.6                                                     | +2.62                           |
| BH(8)                      | -9.2                                                                              | +2.55                           | -10.0                                                     | +2.44                           |
| BH(9)                      | -0.2                                                                              | +2.90                           | -1.2                                                      | +2.94                           |
| BH(10)                     | +8.3                                                                              | +3.20                           | +9.3                                                      | +3.73                           |
| BH(1')                     | +5.5                                                                              | +3.21                           | +5.1                                                      | +2.98                           |
| BH(2')                     | -24.2                                                                             | -0.01                           | -24.1                                                     | -0.42                           |
| BH(3')                     | -12.0                                                                             | +1.90 or +2.20                  | -10.6                                                     | +2.11                           |
| BH(4')                     | -41.6                                                                             | +0.32                           | -39.2                                                     | +0.19                           |
| BH(5')                     | -5.1                                                                              | ligand site                     | -3.4                                                      | +2.76                           |
| BH(8')                     | +4.1                                                                              | +3.65                           | +3.2                                                      | +3.51                           |
| BH(9'')                    | -7.6                                                                              | +2.65                           | -7.7                                                      | +2.55                           |
| BH(10')                    | -12.0                                                                             | +1.90 or +2.20                  | -13.0                                                     | +1.86                           |
| $\mu\text{H}(8,9)$         |                                                                                   | -2.92                           |                                                           | -3.31                           |
| $\mu\text{H}(9,10)$        |                                                                                   | -1.23                           |                                                           | -1.03                           |
| $\mu\text{H}(6/7',7)$      |                                                                                   | -1.80                           |                                                           | -1.88                           |
| $\mu\text{H}(8',9')$       |                                                                                   | -1.38                           |                                                           | -1.59                           |
| $\mu\text{H}(9',10')$      |                                                                                   | -3.60                           |                                                           | -3.90                           |

Notes: \* Ligand species:  $(\text{CD}_3)_2\text{CO}$  solution. \*\* Anion:  $\text{CD}_2\text{Cl}_2$  solution;  $[\text{C}_{10}\text{H}_6(\text{NMe}_2)_2\text{H}]^+$  salt.



SI 9. Crystal structure diagram for compound **3b**.

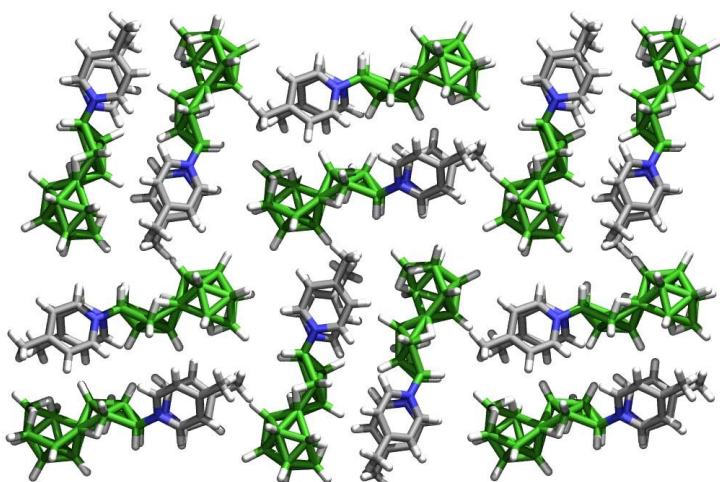

SI 10. CASSCF natural orbitals that compose the CAS active space of  $B_{18}H_{20}Py$ , compound **4**, at the  $(S_0)_{min}$  structure.

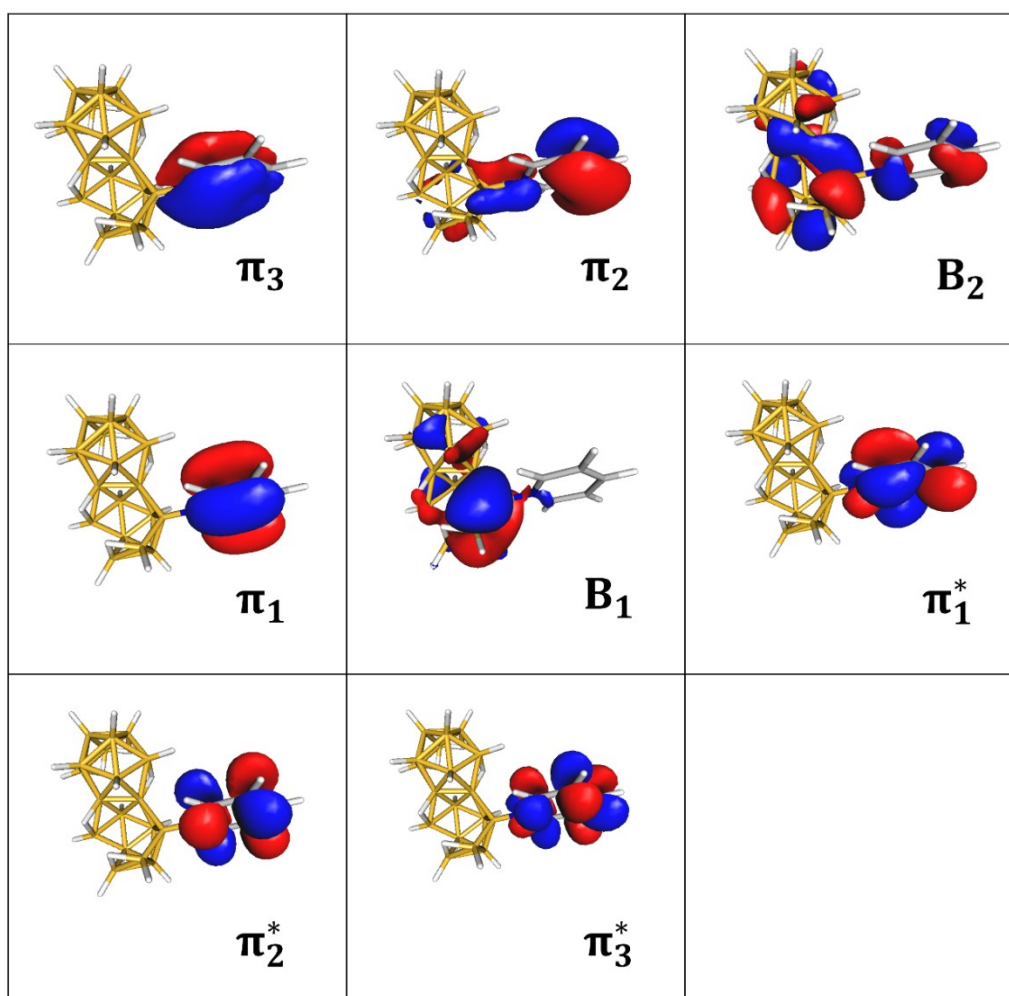

## SI 11. Full rationale for the absorption characteristics of compound 4.

The CASPT2(IPEA=0.25) calculated energy for the most probable electronic transition, 4.54 eV (273 nm), with an  $f$  of 0.2265, has a high value as compared to the experimentally measured absorption band with a band maximum recorded at 320 nm (see Figure 7). The lowest-energy transition computed at 3.69 eV (336 nm) has a much lower  $f$  value (0.0082). The calculation of more states (up to eight) and the use of the multi-state CASPT2 method,<sup>e</sup> which provides more correlated wave functions, do not change the scenario. CASPT2(IPEA=0.00) computations have been also carried out giving rise to vertical transition energies of 3.27 and 3.95 eV (379 and 314 nm) for the excitations to  $S_1$  and  $S_2$ , respectively. The  $f$  values are 0.0073 and 0.1972, respectively. Taking into account both group of values, we can assign the  $S_0 \rightarrow S_2$  electronic transition to the band maximum and the  $S_0 \rightarrow S_1$  one to the broad curve of the band appearing at lower energies. Meanwhile, transitions related to  $S_3$  and  $S_4$  might be responsible for the absorbance appearing in the 250-300 nm range. To be consistent with our previous work,<sup>f</sup> we continue the theoretical analysis on the photophysics of the system using the CASPT2(IPEA=0.25) level of theory. Even though this level shows a worse agreement with the experimental data as compared to the outcomes of the CASPT2(IPEA=0.00) level, the IPEA parameter only provides with a systematic shift of the energies and then the qualitative behavior is maintained.

SI 12. CASSCF natural orbitals that compose the CAS active space of  $B_{16}H_{18}Py_2$ , compound **4**, at the  $(S_0)_{min}$  structure.

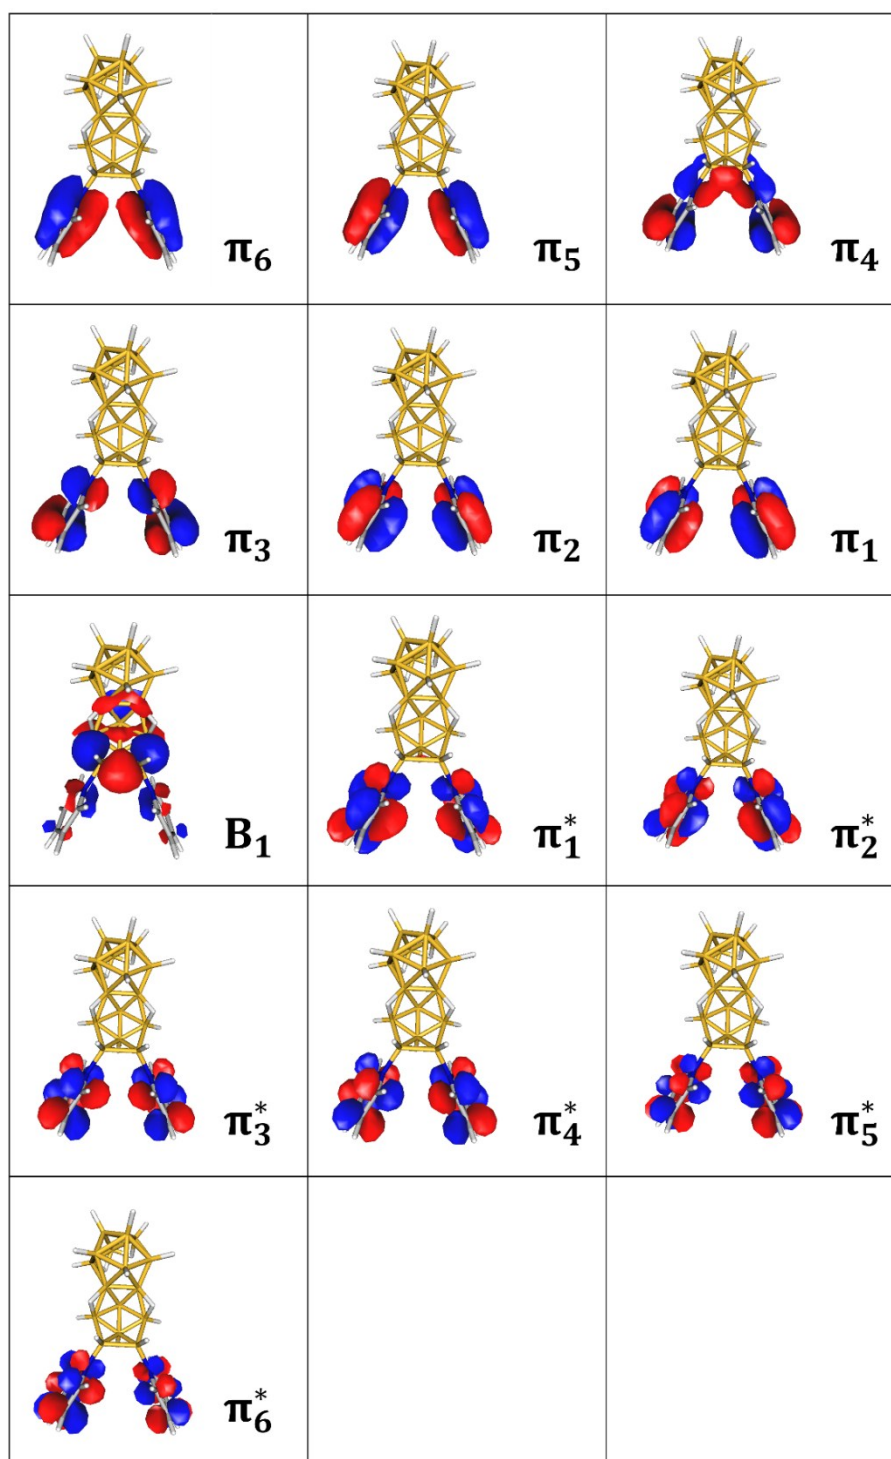

## References

- a. See, for example, page 71 in W. N. Lipscomb, *Boron Hydrides*, Benjamin, New York and Amsterdam, 1963.
- b. See, for example, page 59 in E. L. Muetterties (Ed), *Boron Hydride Chemistry*, Academic, New York, San Francisco and London, 1975.
- c. L. Barton, J. Bould, J. D. Kennedy and N. P. Rath, *J. Chem. Soc., Dalton Trans.*, 1996, 3145-3149.
- d. S. L. Shea, P. I. MacKinnon, M. Thornton-Pett and J. D. Kennedy, *Inorg. Chim. Acta, Special Issue for Gordon Stone*, 2005, **358**, 1709-1714.
- e. J. Finley, P.-Å. Malmqvist, B. O. Roos, and L. Serrano-Andrés, *Chem. Phys. Lett.*, 1998, **228**, 299.
- f. M. G. S. Londesborough, J. Dolanský, L. Cerdán, K. Lang, T. Jelínek, I. Garcia-Moreno, J. M. Oliva, D. Hnyk, D. Roca-Sanjuán, J. Martinčík, M. Nikl, and J. D. Kennedy, *Adv. Opt. Mater.*, 2017, **5**, 1600694.
